# Supplementary material for: Chitosan–Silica Composite Aerogel for the Adsorption of Cupric Ions
Source: MDPI journal article supplement (doi:10.3390/gels10030192), 2024-03-11
Supplement: s1 [file s1]

# Chitosan–Silica Composite Aerogel for the Adsorption of Cupric Ions

João P. Vareda <sup>1</sup>, Pedro M. C. Matias <sup>2</sup>, José A. Paixão <sup>3</sup>, Dina Murtinho <sup>2</sup>, Artur J. M. Valente <sup>2,\*</sup> and Luisa Durães <sup>1</sup>

<sup>1</sup> University of Coimbra, CERES, Department of Chemical Engineering, Rua Silvio Lima, 3030-790 Coimbra, Portugal; jvareda@eq.uc.pt (J.P.V.); luisa@eq.uc.pt (L.D.)

<sup>2</sup> University of Coimbra, CQC-IMS, Department of Chemistry, Rua Larga, 3004-535 Coimbra, Portugal; petermatias1998@gmail.com (P.M.C.M.); dmurtinho@ci.uc.pt (D.M.)

<sup>3</sup> University of Coimbra, CFisUC, Department of Physics, Rua Larga, 3004-516 Coimbra, Portugal; jap@fis.uc.pt

\* Correspondence: avalente@ci.uc.pt

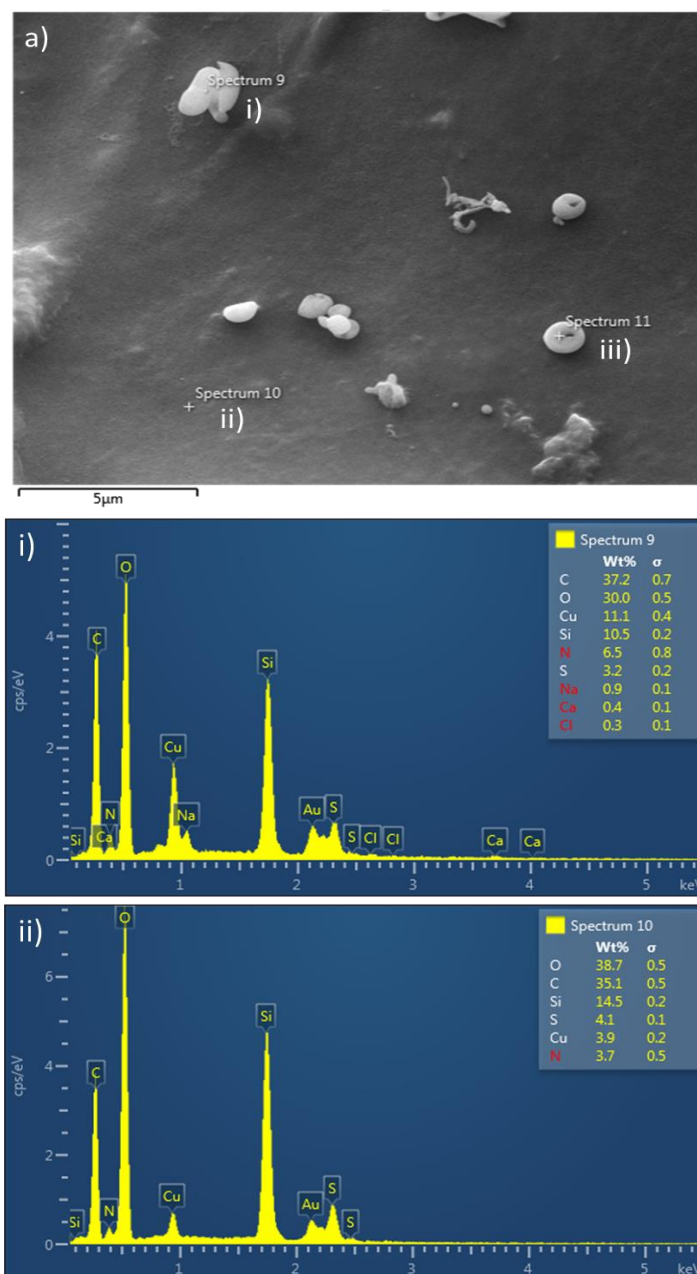

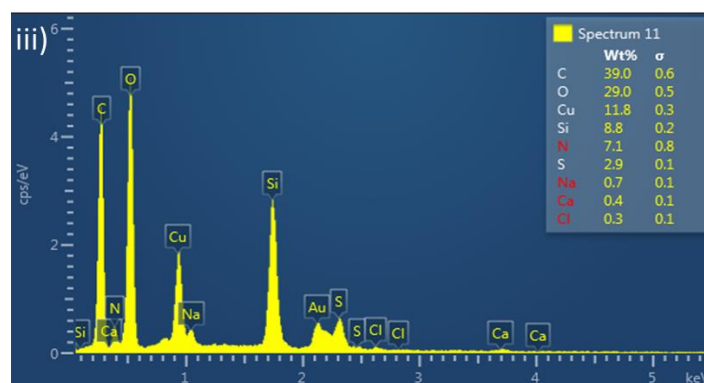

**Figure S1.** SEM image (a) of the copper-loaded chitosan-silica aerogel with three regions highlighted (i, ii) and iii); EDX spectrum of each region (i, ii) and iii)), showing the main components of the aerogel after Cu(II) adsorption.

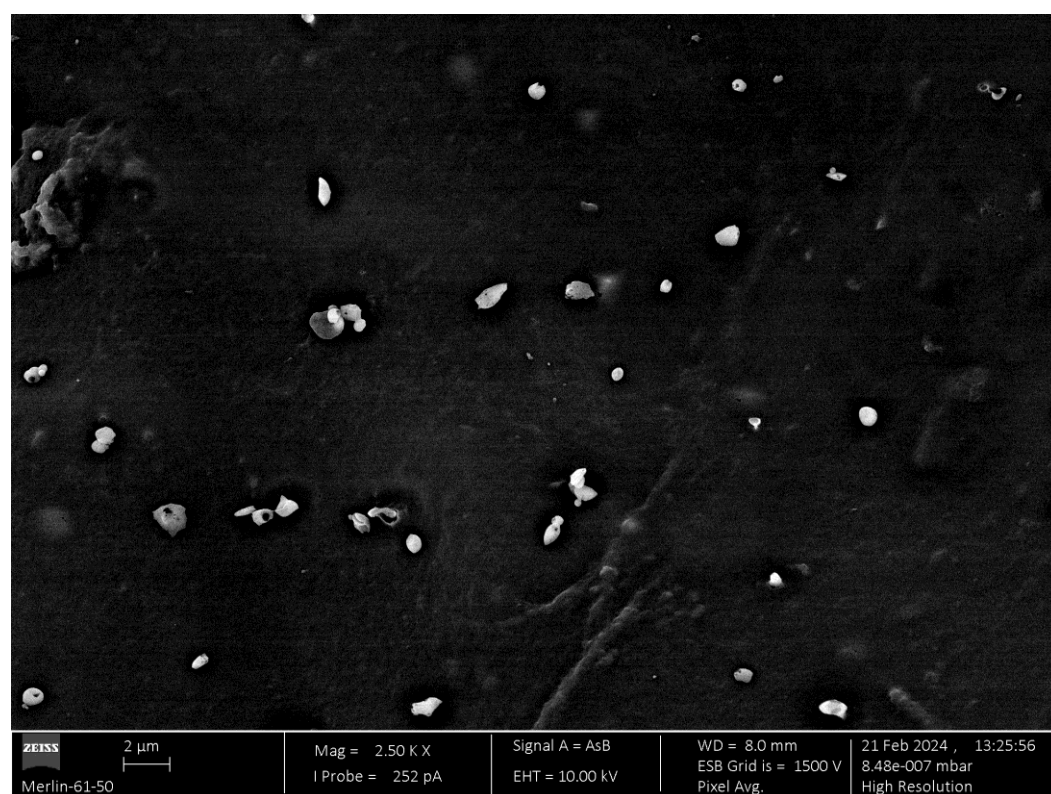

**Figure S2.** Microstructure of the copper-loaded chitosan-silica aerogel at 2.50k $\times$  obtained by backscattered electron SEM imaging.

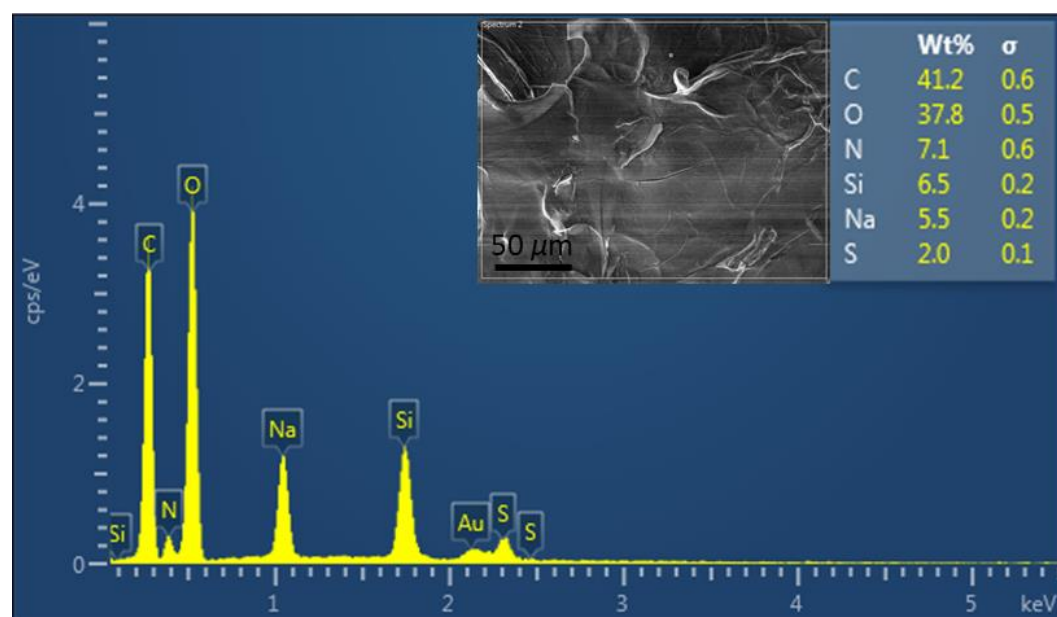

**Figure S3.** EDX spectrum of the neat chitosan-silica aerogel.
